# Supplementary material for: PrimPol Is Required for Replicative Tolerance of G Quadruplexes in Vertebrate Cells
Source: PubMed Central journal article supplement (PMC4712188; doi:10.1016/j.molcel.2015.10.038), 2016-01-07
Supplement: mmc1.pdf [file mmc1.pdf]

**Molecular Cell**

**Supplemental Information**

**PrimPol Is Required for Replicative Tolerance  
of G Quadruplexes in Vertebrate Cells**

**Davide Schiavone, Stanislaw K. Jozwiakowski, Marina Romanello, Guillaume Guilbaud,  
Thomas A. Guillian, Laura J. Bailey, Julian E. Sale, and Aidan J. Doherty**



## Supplementary Figures

**Figure S1. No evidence of high levels of mutation or genetic instability in the *BU-1* locus of Bu-1a<sup>low</sup> cells.** Related to Figure 1.

**A.** Diagram of the *BU-1* locus indicating PCR fragments A, B & C used to detect gross sequence deletions and the relevant restriction enzyme cutting sites in the fragments.

**B.** PCR amplification of fragments A, B & C from wild type cells and a pool of sorted Bu-1a<sup>low</sup> cells.

**C.** Restriction digestion of the fragments shown in (B) cloned into pBluescript.

**D.** Sequences from 9 clones taken from around the +3.5 G4 (highlighted in bold). A polymorphism identifies the *BU-1A* allele (red) and *BU-1B* allele (blue).

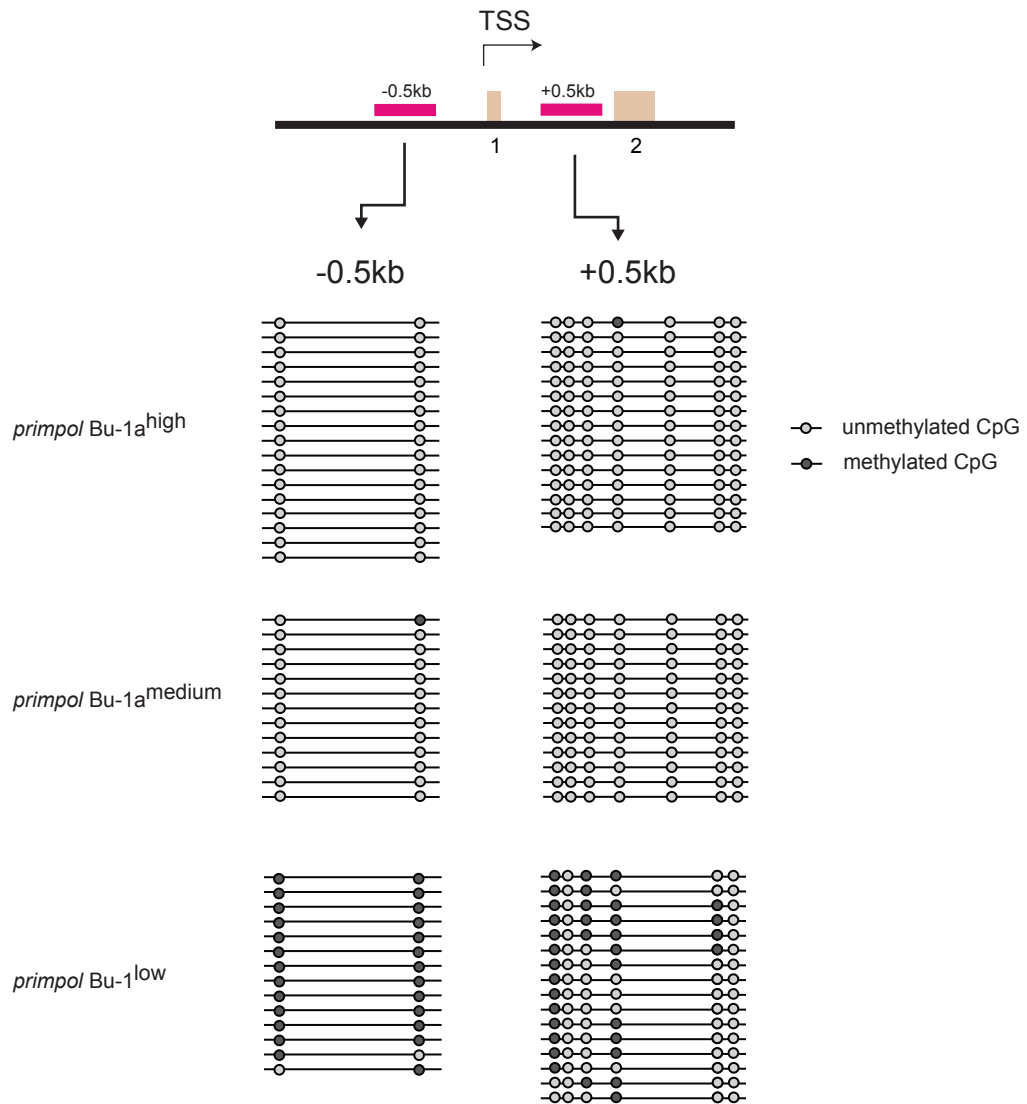



**Figure S2. DNA methylation of the *BU-1* promoter determined by bisulphite sequencing.** Related to Figure 1.

Bisulphite sequencing results for primers spanning regions located approximately 0.5 kb up and downstream of the TSS of *BU-1*. CpG sites are indicated as circles. Open circles = unmethylated; filled circles = methylated.

**A**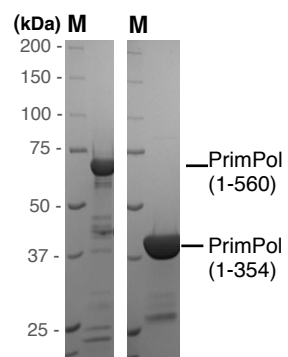**B**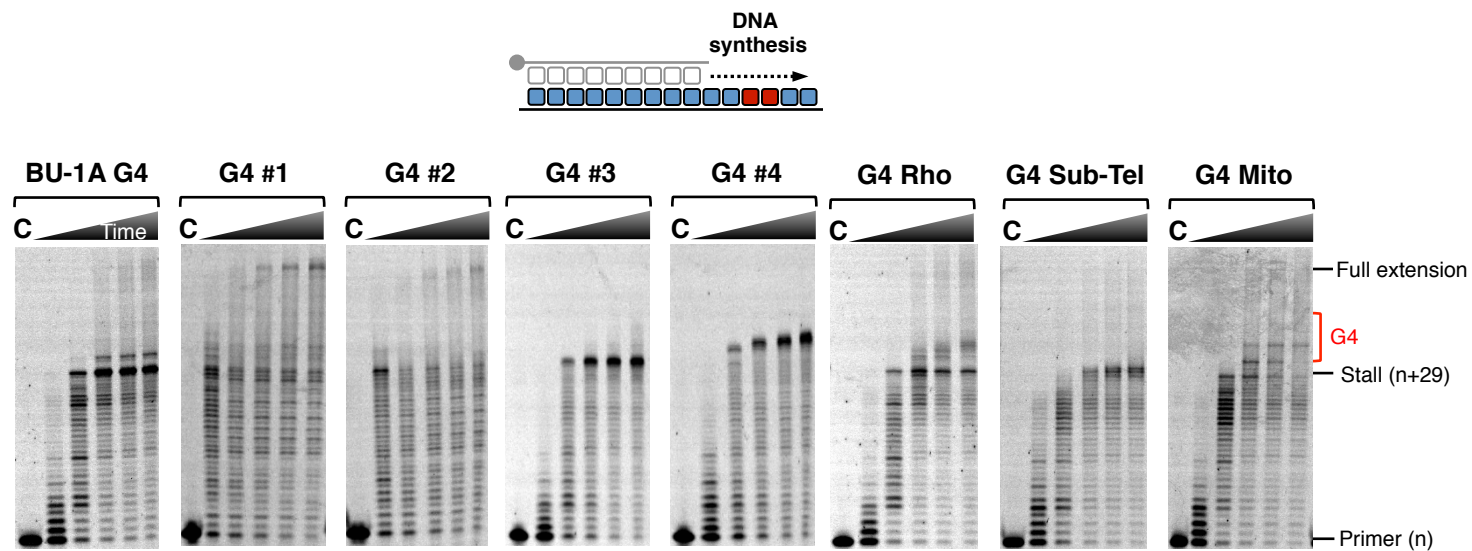**C**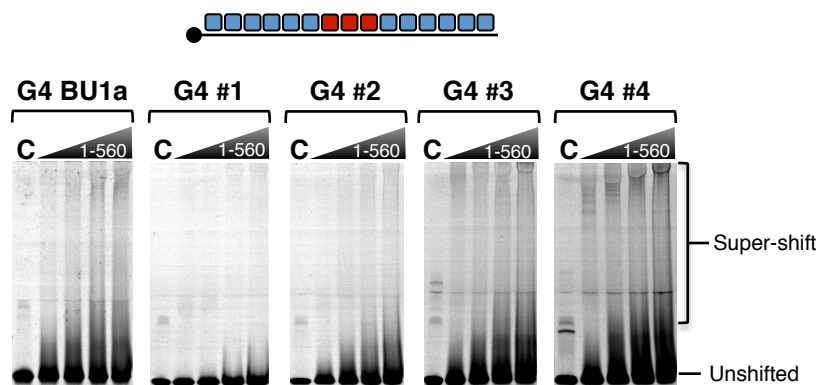**D**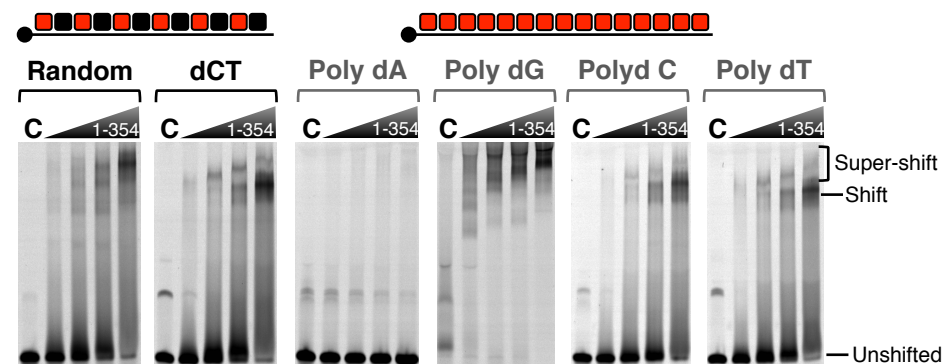

**Figure S3. Preparation of recombinant human PrimPol proteins, primer extensions and electrophoretic mobility shift assays.** Related to Figure 3.

**A.** SDS PAGE analysis of human recombinant PrimPol proteins. Histidine-tagged full-length human PrimPol (1-560) was purified using Ni-NTA affinity purification, heparin, and size-exclusion chromatography. Glutathione S-transferase (GST) tagged truncation of human PrimPol (1-354) was purified using Glutathione affinity chromatography. The GST tag was cleaved off by incubation with prescission protease over night at 4°C. Subsequently, the tagless truncation of PrimPol (1-354) was purified by heparin and size-exclusion chromatography.

**B.** Histidine-tagged full length PrimPol (1-560) at 100 nM was incubated with 20 nM G4 quadruplex containing substrates and 200  $\mu$ M dNTPs for increasing times (1, 2, 5, 10, 20 minutes) at 37°C. A no enzyme control (“C”) was performed as a single 20 minute time point at 37°C in the absence of PrimPol.

**C.** Increasing concentrations (0.7, 2.5, 5, 10  $\mu$ M) of PrimPol<sub>1-560</sub> were incubated with 100 nM fluorescently labelled ssDNA probes. A no enzyme control (“C”) was also performed to monitor mobility of ssDNA probes. The G4 quadruplex structures are marked as red boxes.

**D.** Increasing concentrations (0.7, 2.5, 5, 10  $\mu$ M) of PrimPol<sub>1-354</sub> were incubated with 100 nM fluorescently labelled ssDNA probes. A no enzyme control (“C”) was also performed to monitor the mobility of ssDNA probes. The homopolymeric nucleotide runs are marked as red boxes and mixed sequences as red and black boxes.

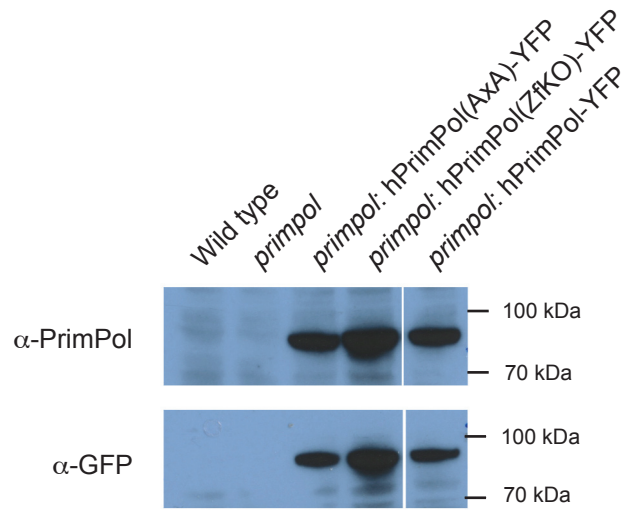

**Figure S4. Western blot of YFP-tagged human PrimPol and mutant derivatives in *primpol* DT40 cells.** Related to Figure 4.

Whole cell lysates blotted with anti-human PrimPol and anti-GFP. Note the anti-human PrimPol antibody does not cross-react against the chicken protein.

## Supplemental Experimental Procedures

### Primers for ChIP qPCR

(c. -0.5kb and +0.5kb from the *BU-1* TSS)

|             |                         |
|-------------|-------------------------|
| ChIP -0.5 F | TAGCTCCAAGGTGTGGGACTTT  |
| ChIP -0.5 R | CCCCATACTGGACAGACTGAATA |
| ChIP +0.5 F | GGCAGCTCAGCAAAGTTTCC    |
| ChIP +0.5 R | GACCACAGCCGTGGAACAGTTA  |

### Primers for methylation analysis

(c. -0.5kb and +0.5kb from the *BU-1* TSS)

|               |                                                       |
|---------------|-------------------------------------------------------|
| Methyl -0.5 F | GTTTCTT <b>GAGCTC</b> TTTGGTAAGTGATAGTTATTGGTATTGTA   |
| Methyl -0.5 R | GTTTCTT <b>GCGGCCGC</b> ATTAACATAAACTCAAACATAACCAACAC |
| Methyl +0.5 F | GTTTCTT <b>GAGCTC</b> GAAATATAAGGTTTTGGTATGTAGAATGT   |
| Methyl +0.5 R | GTTTCTT <b>GCGGCCGC</b> CTCCCTAATCACTAAAATTATATACAAAA |

Colour code: (Pig tail) **SacI/NotI**

### PCR primers for hPrimPol

| Amplicon                  | Forward Primer (5'→3')                     | Reverse Primer (5'→3')                                       |
|---------------------------|--------------------------------------------|--------------------------------------------------------------|
| hPrimPol <sub>1-354</sub> | GTTTCTTGGATCCATGAATA<br>GAAAATGGGAAGCAAAAC | CTTTGTTGCGGCCGCTTACTCTTGTAACTTCTATAATT<br>AGTTCATCAGGAATTTTC |

### Synthetic primer-template substrates

| Figure (Substrate) | Primer (5'→3')            | Template (5'→3')                                                                                                                   |
|--------------------|---------------------------|------------------------------------------------------------------------------------------------------------------------------------|
| S3B (G4 BU1a)      | TGTCGTCTGTTCCGGTC<br>GTTC | ACCGCGAACTTGAATTCTA <b>GGGCTGGGTGGG</b> TGCTGT<br>CA <b>AGGGCTGGG</b> CAATGCACAACATATGGCTTTCGAAG<br>ACCGAACGACCGAACAGACGACA        |
| S3B (G4#1)         | TGTCGTCTGTTCCGGTC<br>GTTC | ACCGCGAACTTGAATTCTATT <b>GGTTTTGGTTTTGGTTTT</b><br><b>GGT</b> CAATGCACAACATATGGCTTTCGAAGACCGAACGA<br>CCGAACAGACGACA                |
| S3B (G4#2)         | TGTCGTCTGTTCCGGTC<br>GTTC | ACCGCGAACTTGAATTCTAT <b>GGGTTTGGGTTTGGGTTT</b><br><b>GGG</b> CAATGCACAACATATGGCTTTCGAAGACCGAAC<br>GACCGAACAGACGACA                 |
| S3B (G4#3)         | TGTCGTCTGTTCCGGTC<br>GTTC | ACCGCGAACTTGAATTCTAT <b>GGGGTTGGGGTTGGGGT</b><br><b>TGGGG</b> CAATGCACAACATATGGCTTTCGAAGACCGAA<br>CGACCGAACAGACGACA                |
| S3B (G4#4)         | TGTCGTCTGTTCCGGTC<br>GTTC | ACCGCGAACTTGAATTCTATTTT <b>GGGTGGGTGGGTGG</b><br><b>GTTTT</b> CAATGCACAACATATGGCTTTCGAAGACCGAAC<br>GACCGAACAGACGACA                |
| S3B (G4 Rho)       | TGTCGTCTGTTCCGGTC<br>GTTC | ACCGCGAACTTGAATTCTAG <b>GGGAGTAAAAGGGAGCG</b><br><b>GGT</b> GTCT <b>GGG</b> GCAATGCACAACATATGGCTTTCGAAGA<br>CCGAACGACCGAACAGACGACA |
